# Supplementary material
Source: publisher site journal article supplement (https://www.dovepress.com/get_supplementary_file.php?f=311788.docx)
Supplement: Supplementary file 1 [file get_supplementary_file.php]

**Supplementary Table 1.** Description of the intervention modules, content and exercises

| **Module** | **Content** | **Adolescent exercise** |
| --- | --- | --- |
| Orientation | - Welcoming words - Security, net etiquette and copyright - Description and aims of the program - News - Discussion forum - Introduction of program leaders and tutors - Information about Moodle - Information about the exercises | Reading the information |
| 1  Well-being | - Information why the topic is important - Information about aspects of well-being in everyday life: mental health, interpersonal relationships, sexuality, drugs and tobacco, spirituality and religion | Writing in a “diary” in the Moodle about any worries or concerns and about ideas how to reduce stressors after reading information about the topic. |
| 2  Me and my family | - Information about adolescents as family members: different families, families’ everyday life and difficult situations at home - Information about how to communicate in a positive way | Filling the Internet Addiction Test (IAT) on Internet. Writing in a “diary” about the own family and about the feelings when filling IAS-test. |
| 3  My rights and responsibilities | - Information about adolescents’ rights and responsibilities: rights in health care and the status and rights of patients | Writing in a “diary” about own rights and responsibilities, and the attitudes towards them. |
| 4  Depression | - Information of adolescents’ depression: what is depression, how common depression is, what causes depression, with whom to talk about depression and other mental disorders related to depression - Adolescents’ own experiences of depression and recovery | Filling a health related questionnaire on Internet. Writing in a “diary” about own strengths or worries. Writing about filling the questionnaire and feelings about the results. |
| 5  Caring for myself | - Information about treatment of depression - Ways to identify depression - Prevention of depression | Writing in a “diary” about the future: plans and dreams in the future. Writing about things that make happy and give joy. |
| Feedback | - Thanksgiving for the participating | Filling a Webropol feedback questionnaire. |
